# Supplementary material for: 3D gelatin-chitosan hybrid hydrogels combined with human platelet lysate highly support human mesenchymal stem cell proliferation and osteogenic differentiation
Source: PubMed Central journal article supplement — J Tissue Eng. 2019 May 2;10:2041731419845852. doi: 10.1177/2041731419845852 (PMC6507314; doi:10.1177/2041731419845852), 2019-05-02
Supplement: Supplementary_material_with_revision.pdf [file Supplementary_material_with_revision.pdf]

### **3D Gelatin-Chitosan hybrid Hydrogels combined with human Platelet Lysate highly support human Mesenchymal Stem Cell proliferation and osteogenic differentiation**

*Federica Re<sup>1,2</sup>, Luciana Sartore<sup>3</sup>, Vladimira Moulisova<sup>4,5</sup>, Marco Cantini<sup>5</sup>, Camillo Almici<sup>6</sup>, Andrea Bianchetti<sup>6</sup>, Clizia Chinello<sup>7</sup>, Kamol Dey<sup>3</sup>, Silvia Agnelli<sup>3</sup>, Cristina Manfredini<sup>8</sup>, Simona Bernardi<sup>1,2</sup>, Nicola F. Lopomo<sup>9</sup>, Emilio Sardini<sup>9</sup>, Elisa Borsani<sup>10,11</sup>, Luigi F. Rodella<sup>10,11</sup>, Fabio Savoldi<sup>12,13</sup>, Corrado Paganelli<sup>12</sup>, Pierangelo Guizzi<sup>14</sup>, Gina Lisignoli<sup>8</sup>, Fulvio Magni<sup>7</sup>, Manuel Salmeron-Sanchez<sup>5</sup>, Domenico Russo<sup>1\*</sup>*

<sup>1</sup>Department of Clinical and Experimental Sciences, University of Brescia, Bone Marrow Transplant Unit, ASST Spedali Civili, Brescia, Italy,

<sup>2</sup>CREA (Centro di Ricerca Emato-Oncologica AIL), ASST Spedali Civili di Brescia, Brescia, Italy,

<sup>3</sup>Mechanical and Industrial Engineering Department, University of Brescia, Brescia, Italy,

<sup>4</sup>Biomedical Center, Faculty of Medicine, Charles University, Pilsen, Czech Republic,

<sup>5</sup>Centre for the Cellular Microenvironment, Division of Biomedical Engineering, School of Engineering, University of Glasgow, Glasgow, United Kingdom,

<sup>6</sup>Laboratory for Stem Cells Manipulation and Cryopreservation, Department of Transfusion Medicine, ASST Spedali Civili, Brescia, Italy,

<sup>7</sup>Department of Medicine and Surgery, Clinical Proteomics and Metabolomics Unit, University of Milano-Bicocca, Veduggio al Lambro, Italy,

<sup>8</sup>IRCCS Istituto Ortopedico Rizzoli, Laboratorio di Immunoreumatologia e Rigenerazione Tissutale, Bologna, Italy,

<sup>9</sup>Department of Information Engineering, University of Brescia, Brescia, Italy,

<sup>10</sup>Department of Clinical and Experimental Sciences, Division of Anatomy and Physiopathology, University of Brescia, Brescia, Italy,

<sup>11</sup>Interdipartimental University Center of Research "Adaptation and Regeneration of Tissues and Organs - (ARTO)", University of Brescia, Brescia, Italy,

<sup>12</sup>Department of Orthodontics, Dental School, University of Brescia, Brescia, Italy,

<sup>13</sup>Dental Materials Science, Discipline of Applied Oral Sciences, Faculty of Dentistry,  
The University of Hong Kong, Hong Kong,

<sup>14</sup>UO of Orthopedic and Traumatology, ASST Spedali Civili of Brescia, Brescia, Italy

Corresponding author: \*Domenico Russo, Department of Clinical and Experimental Sciences, University of Brescia, Bone Marrow Transplant Unit, ASST Spedali Civili, Brescia, Italy. Tel: +39 0303996812; Fax: +39 0303996811; E-mail: [domenico.russo@unibs.it](mailto:domenico.russo@unibs.it)

### **Supplementary material**

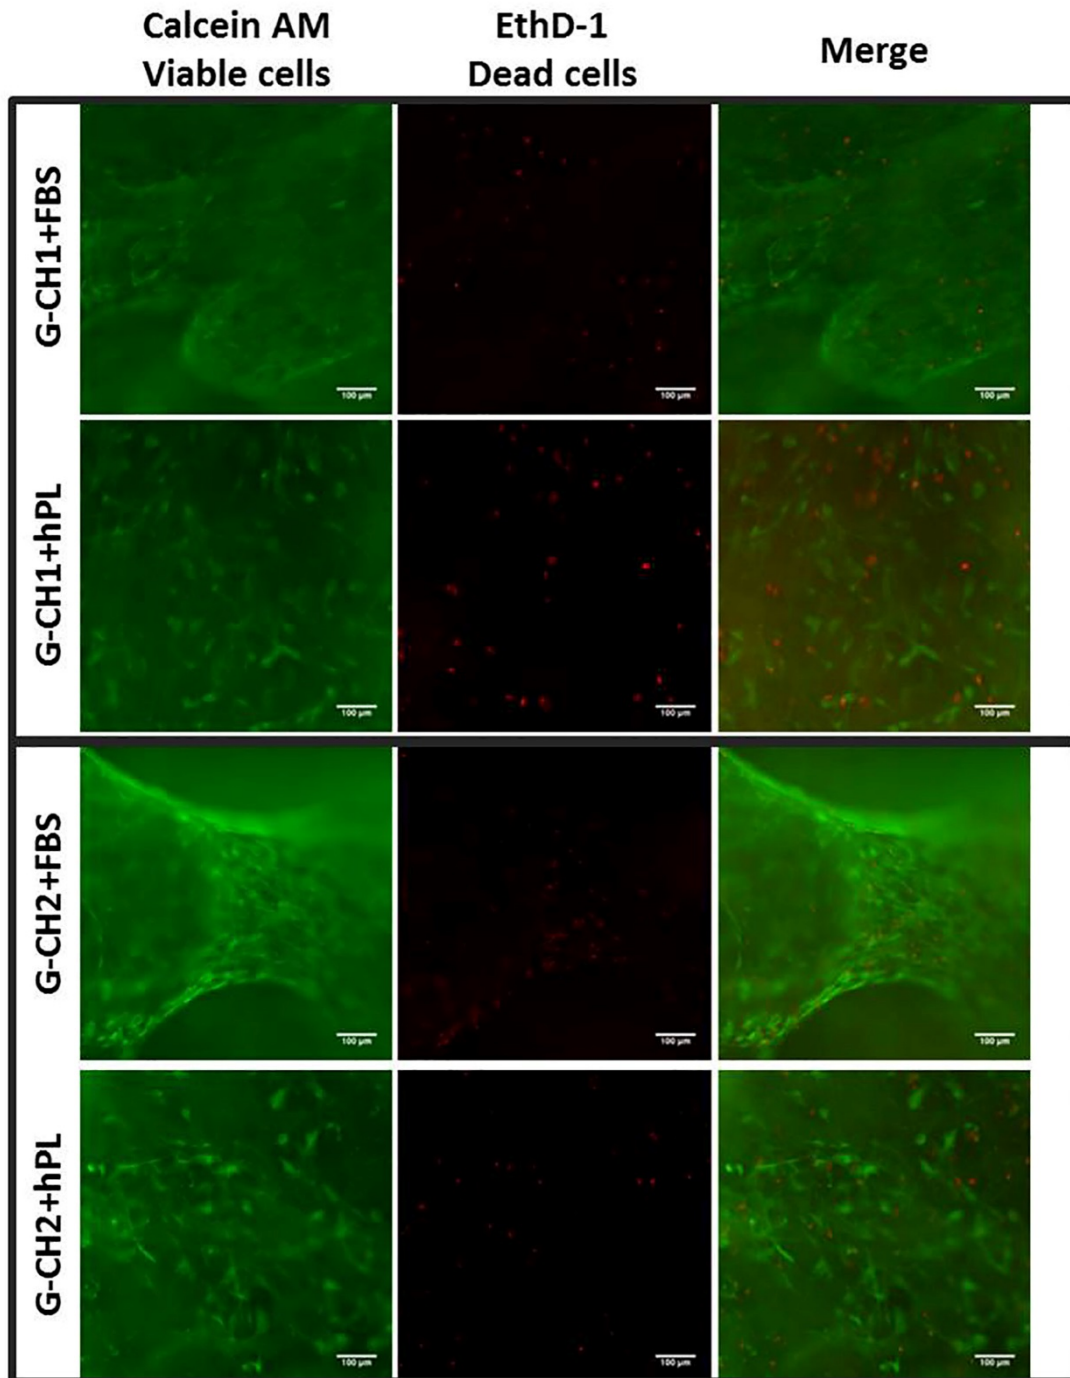

**Supplementary Figure S1** Live/Dead staining of BM-hMSCs cultivated for 21 days in G-CH1 and G-CH2 hydrogels in the complete medium FBS or complete medium hPL. Scale bar: 100  $\mu\text{m}$ .

SEM-Day 21

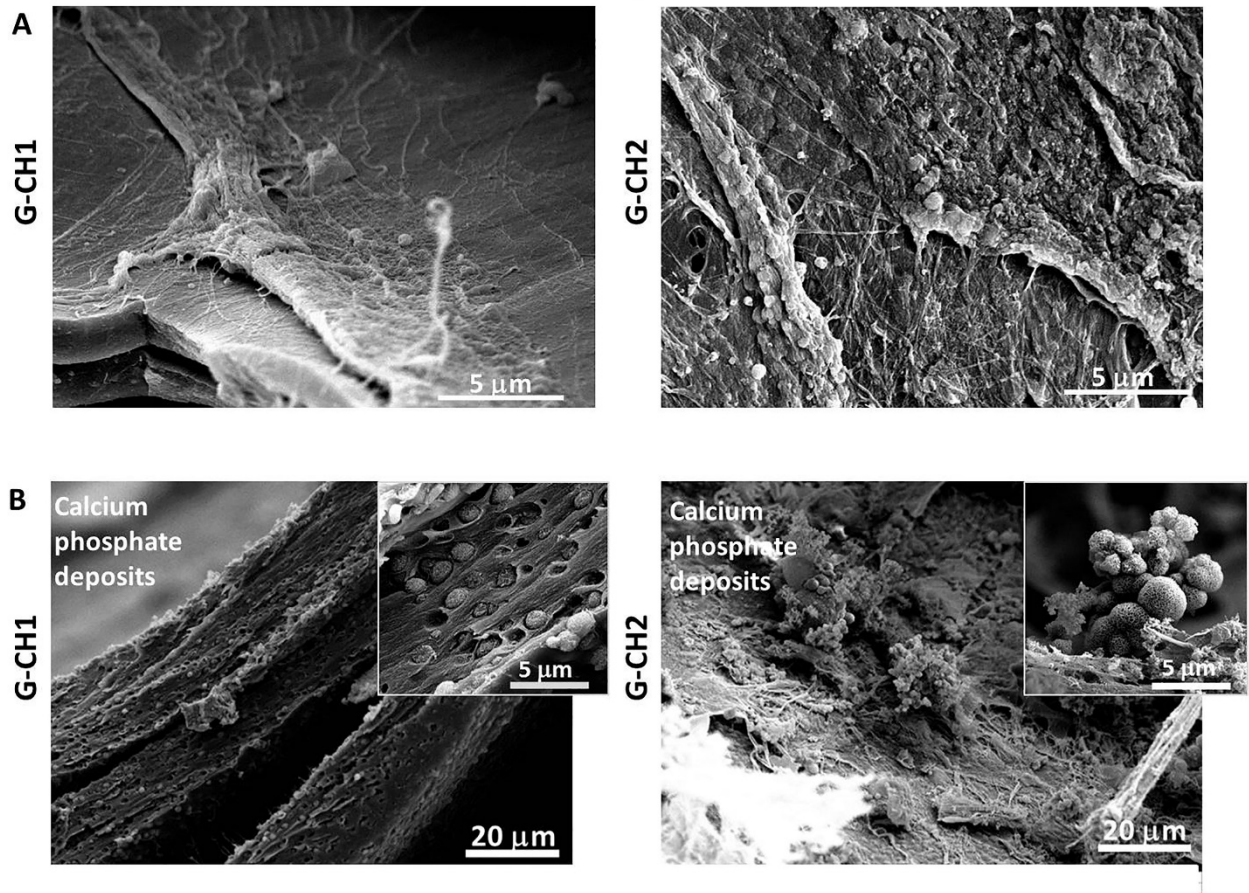

**Supplementary Figure S2 (A)** SEM micrographs of BM-hMSCs cultivated in G-CH1 scaffold and G-CH2 scaffold in complete medium hPL w/o osteogenic differentiation stimuli at 21 days culture. Scale bar: 5 μm. **(B)** SEM micrographs of calcium phosphate deposition in G-CH1 and G-CH2 with BM-hMSCs at day 21 with osteogenic differentiation stimuli and hPL. Scale bars: 20 μm and 5 μm.

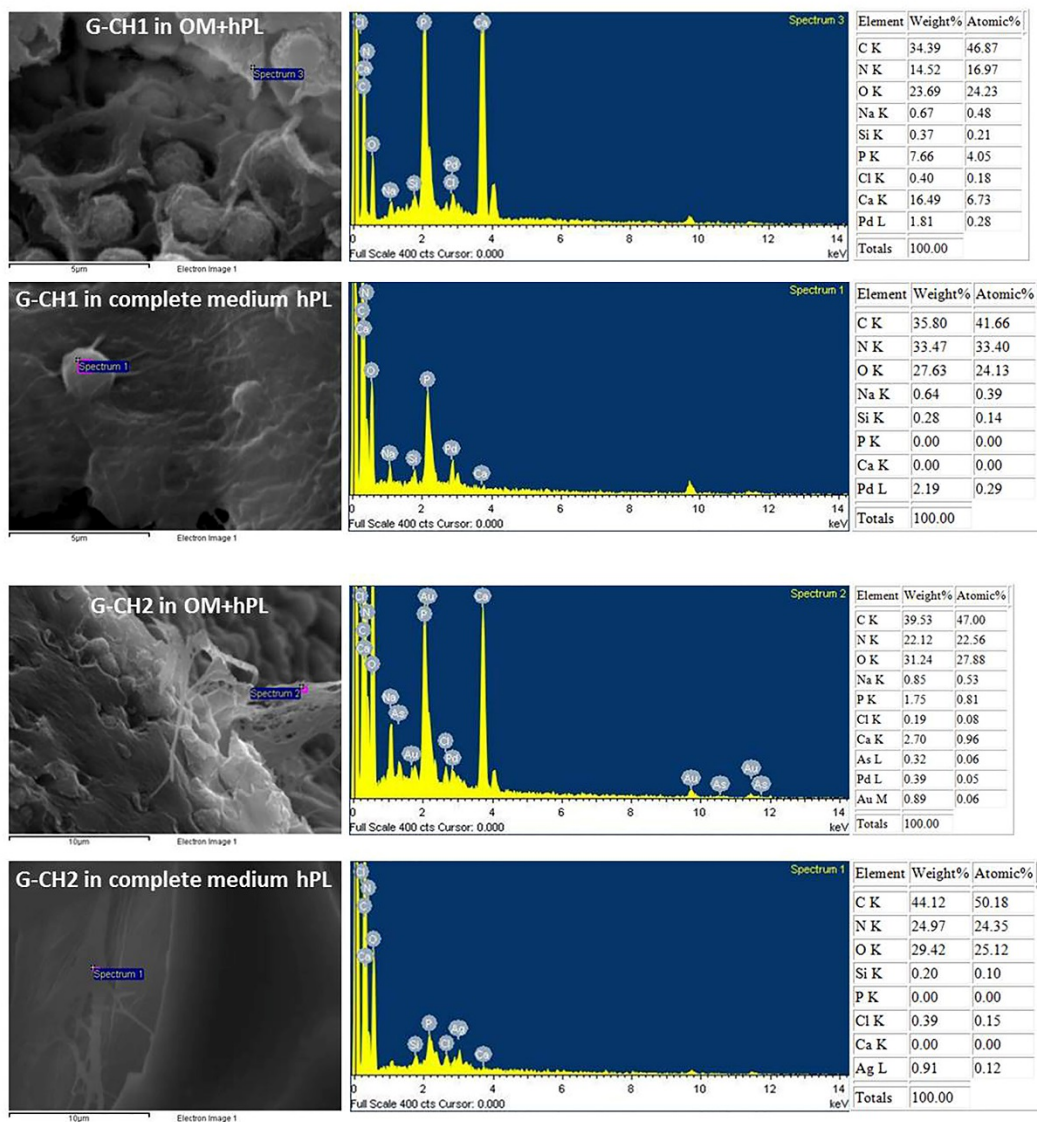

**Supplementary Figure S3** Evaluation of calcium phosphate deposition with SEM-EDX of G-CH1 in OM with hPL , G-CH1 in complete medium hPL, G-CH2 in OM with hPL and G-CH2 in complete medium hPL at day 21. EDX spectra of treated sample area were reported.

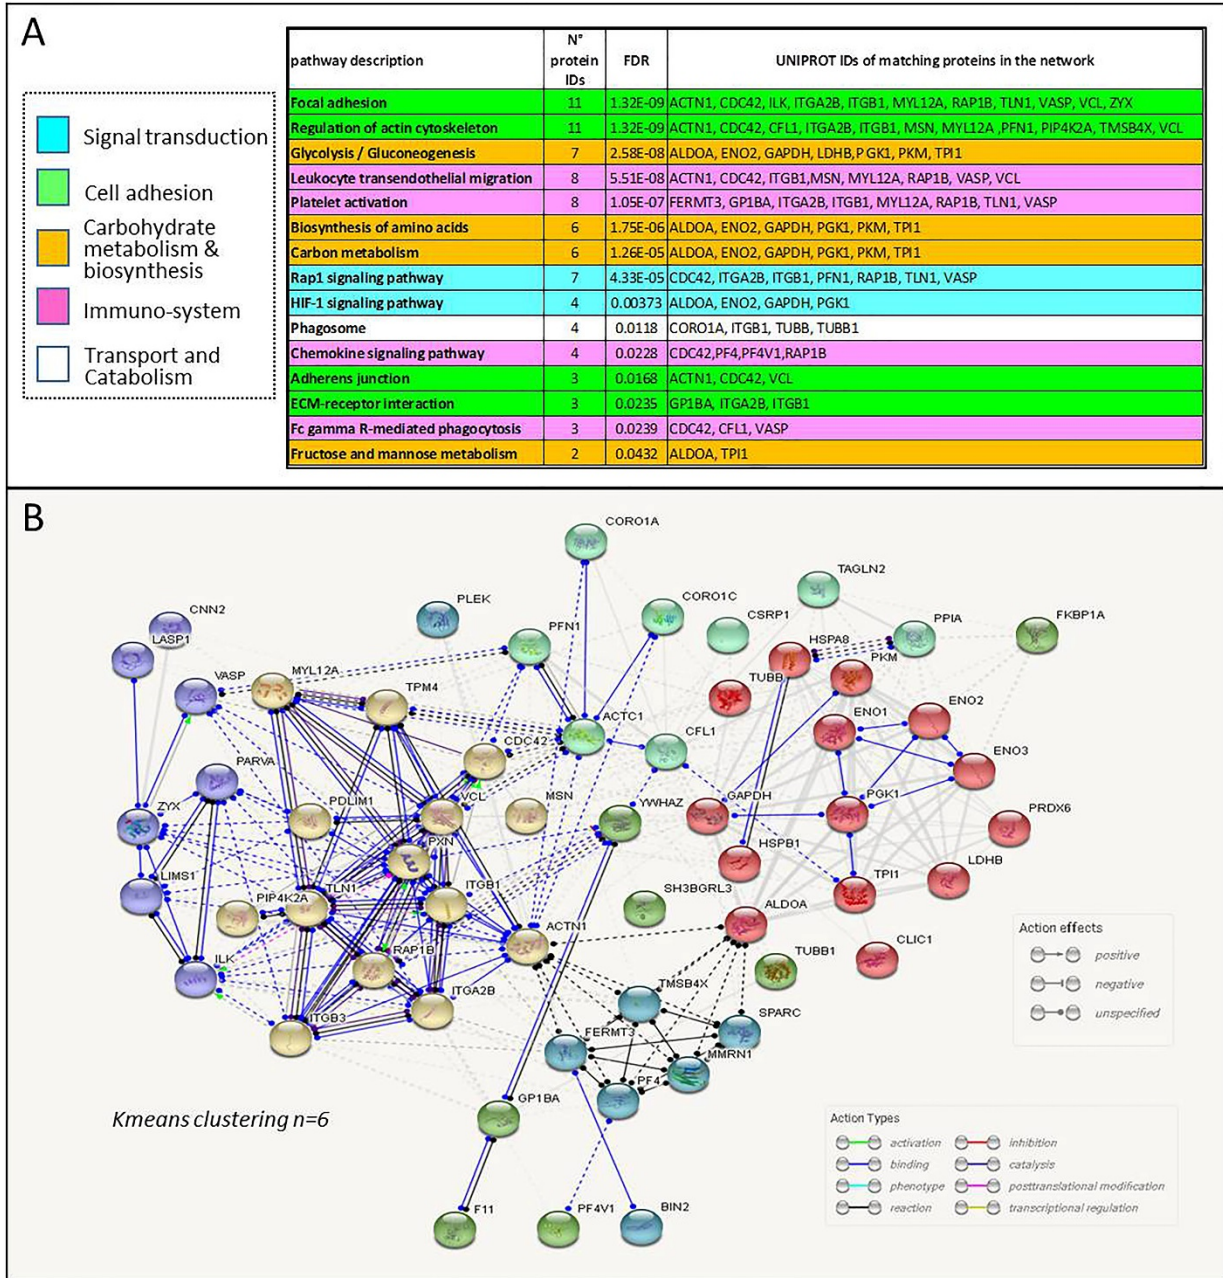

**Supplementary Figure S4** Enrichment in KEGG pathways (**A**) and networks (**B**) based on STRING annotation tool (<https://string-db.org/>) applied on the list of 59 protein specific of only hPL independently from sample preparation method. Network edges are based on molecular action (Kmeans clustering n=6). FDR=False Discovery Rate.

| UNIPROT Accession  | Description                         | Protein Avg Mass (Da) | protein coverage (%) | Unique peptides | Average Normalized Area |                  | RATIO (hPL/PPP) |
|--------------------|-------------------------------------|-----------------------|----------------------|-----------------|-------------------------|------------------|-----------------|
|                    |                                     |                       |                      |                 | NOT depleted hPL        | NOT depleted PPP |                 |
| P02775 CXCL7_HUMAN | Platelet basic protein              | 13894                 | 19                   | 2               | 1.65E+06                | 7.38E+04         | 22.4            |
| P68871 HBB_HUMAN   | Hemoglobin subunit beta             | 15998                 | 32                   | 2               | 1.81E+06                | 2.57E+05         | 7.0             |
| P69905 HBA_HUMAN   | Hemoglobin subunit alpha            | 15258                 | 30                   | 3               | 6.93E+06                | 1.14E+06         | 6.1             |
| P0DOX2 IGA2_HUMAN  | Immunoglobulin alpha-2 heavy chain  | 48935                 | 32                   | 2               | 3.95E+05                | 1.63E+05         | 2.4             |
| P02751 FINC_HUMAN  | Fibronectin                         | 262622                | 26                   | 47              | 3.24E+06                | 5.04E+06         | 0.6             |
| P02671 FIBA_HUMAN  | Fibrinogen alpha chain              | 94973                 | 53                   | 79              | 1.51E+07                | 2.84E+07         | 0.5             |
| P01593 KVD33_HUMAN | Immunoglobulin kappa variable 1D-33 | 12848                 | 38                   | 2               | 8.54E+04                | 2.01E+05         | 0.4             |

**Supplementary Figure S5** List of significant protein differences obtained comparing hPL and PPP in not depleted samples, based on Peaks Studio, applying the following filters: Fold change $\geq$ 1.5; pANOVA $<$ 0.05;  $\geq$ 2unique peptides, in at least 4 of 12 replicates.

| UNIPROT Accession  | Description                              | Protein Avg Mass (Da) | protein coverage (%) | Unique peptides | Average Normalized Area |                  | RATIO (hPL/PPP) |
|--------------------|------------------------------------------|-----------------------|----------------------|-----------------|-------------------------|------------------|-----------------|
|                    |                                          |                       |                      |                 | NOT depleted hPL        | NOT depleted PPP |                 |
| P02775 CXCL7_HUMAN | Platelet basic protein                   | 13894                 | 40                   | 4               | 3.58E+06                | 8.59E+04         | 41.7            |
| P07996 TSP1_HUMAN  | Thrombospondin-1                         | 129383                | 3                    | 2               | 1.02E+06                | 4.57E+04         | 22.3            |
| P68871 HBB_HUMAN   | Hemoglobin subunit beta                  | 15998                 | 50                   | 4               | 5.16E+06                | 8.50E+05         | 6.1             |
| P69905 HBA_HUMAN   | Hemoglobin subunit alpha                 | 15258                 | 36                   | 6               | 9.66E+06                | 2.59E+06         | 3.7             |
| P06681 CO2_HUMAN   | Complement C2                            | 83268                 | 7                    | 6               | 1.56E+06                | 5.69E+05         | 2.7             |
| P0C0L5 CO4B_HUMAN  | Complement C4-B                          | 192750                | 36                   | 2               | 3.78E+05                | 1.42E+05         | 2.7             |
| P59666 DEF3_HUMAN  | Neutrophil defensin 3                    | 10245                 | 19                   | 2               | 3.89E+05                | 1.54E+05         | 2.5             |
| P21333 FLNA_HUMAN  | Filamin-A                                | 280737                | 5                    | 7               | 1.11E+06                | 4.52E+05         | 2.5             |
| P15814 IGLL1_HUMAN | Immunoglobulin lambda-like polypeptide 1 | 22963                 | 11                   | 2               | 2.28E+06                | 9.48E+05         | 2.4             |
| P15169 CBPN_HUMAN  | Carboxypeptidase N catalytic chain       | 52286                 | 4                    | 2               | 3.95E+05                | 1.88E+05         | 2.1             |
| O00187 MASP2_HUMAN | Mannan-binding lectin serine protease 2  | 75702                 | 6                    | 3               | 2.03E+05                | 1.00E+05         | 2.0             |
| P07360 CO8G_HUMAN  | Complement component C8 gamma chain      | 22277                 | 30                   | 5               | 1.16E+06                | 6.43E+05         | 1.8             |
| P01860 IGHG3_HUMAN | Immunoglobulin heavy constant gamma 3    | 41287                 | 28                   | 2               | 4.05E+06                | 2.39E+06         | 1.7             |
| P02748 CO9_HUMAN   | Complement component C9                  | 63173                 | 34                   | 15              | 3.39E+06                | 2.02E+06         | 1.7             |
| P22792 CPN2_HUMAN  | Carboxypeptidase N subunit 2             | 60557                 | 6                    | 2               | 1.24E+06                | 7.49E+05         | 1.7             |
| Q9Y490 TLN1_HUMAN  | Talin-1                                  | 269765                | 2                    | 4               | 1.85E+06                | 1.14E+06         | 1.6             |
| P26927 HGFL_HUMAN  | Hepatocyte growth factor-like protein    | 80320                 | 11                   | 4               | 5.45E+05                | 3.50E+05         | 1.6             |
| P01034 CYTC_HUMAN  | Cystatin-C                               | 15799                 | 19                   | 2               | 1.90E+05                | 1.23E+05         | 1.5             |
| P00742 FA10_HUMAN  | Coagulation factor X                     | 54732                 | 6                    | 3               | 6.97E+05                | 1.19E+06         | 0.6             |
| P05160 F13B_HUMAN  | Coagulation factor XIII B chain          | 75511                 | 15                   | 8               | 5.81E+05                | 1.06E+06         | 0.5             |
| Q9Y6R7 FCGBP_HUMAN | IgGfc-binding protein                    | 572021                | 1                    | 4               | 1.90E+05                | 3.50E+05         | 0.5             |
| Q8IU80 TMPS6_HUMAN | Transmembrane protease serine 6          | 90000                 | 4                    | 2               | 1.40E+06                | 2.67E+06         | 0.5             |
| Q15485 FCN2_HUMAN  | Ficolin-2                                | 34001                 | 8                    | 2               | 3.74E+05                | 7.38E+05         | 0.5             |

**Supplementary Figure S6** List of significant protein differences obtained comparing hPL and PPP in depleted samples, based on Peaks Studio, applying the following filters: Fold change $\geq$ 1.5; pANOVA $<$ 0.05;  $\geq$ 2unique peptides, in at least 4 of 12 replicates.



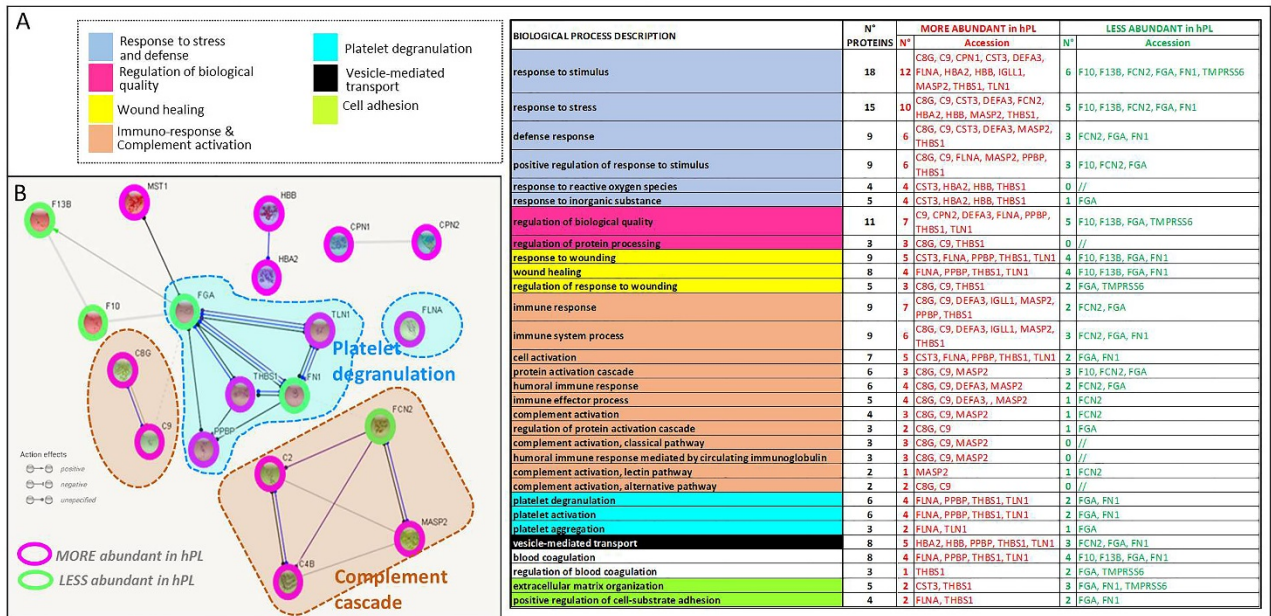

**Supplementary Figure S7** Enrichment in biological processes **(A)** and networks **(B)** based on STRING annotation tool (<https://string-db.org/>) applied on proteins resulted significantly varied in their abundance by label-free relative quantification. Network edges are based on molecular action (Kmeans clustering n=6).

**[Insert Supplementary Table 1 rev]**

**Supplementary Table 1** Enrichment in biological process based on STRING annotation tool (<https://string-db.org/>) applied on the list of 59 proteins specific of only hPL independently from sample preparation method.
