# Supplementary material for: 3D gelatin-chitosan hybrid hydrogels combined with human platelet lysate highly support human mesenchymal stem cell proliferation and osteogenic differentiation
Source: PubMed Central journal article supplement — J Tissue Eng. 2019 May 2;10:2041731419845852. doi: 10.1177/2041731419845852 (PMC6507314; doi:10.1177/2041731419845852), 2019-05-02
Supplement: Supplementary_Table_1_rev.pdf [file Supplementary_Table_1_rev.pdf]

## #pathway ID

GO.0006950  
GO.0050896  
GO.0044707  
GO.0042060  
GO.0007596  
GO.0065008  
GO.0044767  
GO.0001775  
GO.0044765  
GO.0048856  
GO.0051179  
GO.1902578  
GO.0006810  
GO.0030168  
GO.0032879  
GO.0051234  
GO.0048869  
GO.0006928  
GO.0030154  
GO.0007155  
GO.0016192  
GO.0051649  
GO.0007166  
GO.0032940  
GO.0051270  
GO.0009605  
GO.0051641  
GO.0006887  
GO.0030334

GO.0002376  
GO.0002576  
GO.0009888  
GO.0051128  
GO.0016337  
GO.0040011  
GO.0071822  
GO.0048468  
GO.0030029  
GO.0006935  
GO.0000904  
GO.0000902  
GO.0034109  
GO.0070527  
GO.0030036  
GO.0048812  
GO.0031175  
GO.0016477  
GO.0019637  
GO.0048666  
GO.0007010  
GO.0051674  
GO.0022603  
GO.0030030  
GO.0031589  
GO.0030335  
GO.0007411  
GO.0007409  
GO.0061564  
GO.0048667  
GO.0048729  
GO.0030198

GO.0022604  
GO.0019674  
GO.0007229  
GO.0007160  
GO.0032535  
GO.0032970  
GO.0051493  
GO.0009117  
GO.0061621  
GO.0006090  
GO.0008064  
GO.0010632  
GO.0034329  
GO.0007015  
GO.0046034  
GO.0050900  
GO.0032956  
GO.0006094  
GO.0006909  
GO.0006936  
GO.0051271  
GO.0010634  
GO.0010594  
GO.0002685  
GO.0001667  
GO.0034446  
GO.0007044  
GO.0030834  
GO.0006458  
GO.0030260  
GO.0010595  
GO.0051683

GO.0009629

GO.0070493

GO.0030836

GO.0043206

## **pathway description**

response to stress  
response to stimulus  
single-multicellular organism process  
wound healing  
blood coagulation  
regulation of biological quality  
single-organism developmental process  
cell activation  
single-organism transport  
anatomical structure development  
localization  
single-organism localization  
transport  
platelet activation  
regulation of localization  
establishment of localization  
cellular developmental process  
movement of cell or subcellular component  
cell differentiation  
cell adhesion  
vesicle-mediated transport  
establishment of localization in cell  
cell surface receptor signaling pathway  
secretion by cell  
regulation of cellular component movement  
response to external stimulus  
cellular localization  
exocytosis  
regulation of cell migration

immune system process  
platelet degranulation  
tissue development  
regulation of cellular component organization  
single organismal cell-cell adhesion  
locomotion  
protein complex subunit organization  
cell development  
actin filament-based process  
chemotaxis  
cell morphogenesis involved in differentiation  
cell morphogenesis  
homotypic cell-cell adhesion  
platelet aggregation  
actin cytoskeleton organization  
neuron projection morphogenesis  
neuron projection development  
cell migration  
organophosphate metabolic process  
neuron development  
cytoskeleton organization  
localization of cell  
regulation of anatomical structure morphogenesis  
cell projection organization  
cell-substrate adhesion  
positive regulation of cell migration  
axon guidance  
axonogenesis  
axon development  
cell morphogenesis involved in neuron differentiation  
tissue morphogenesis  
extracellular matrix organization

regulation of cell morphogenesis  
NAD metabolic process  
integrin-mediated signaling pathway  
cell-matrix adhesion  
regulation of cellular component size  
regulation of actin filament-based process  
regulation of cytoskeleton organization  
nucleotide metabolic process  
canonical glycolysis  
pyruvate metabolic process  
regulation of actin polymerization or depolymerization  
regulation of epithelial cell migration  
cell junction assembly  
actin filament organization  
ATP metabolic process  
leukocyte migration  
regulation of actin cytoskeleton organization  
gluconeogenesis  
phagocytosis  
muscle contraction  
negative regulation of cellular component movement  
positive regulation of epithelial cell migration  
regulation of endothelial cell migration  
regulation of leukocyte migration  
ameboidal-type cell migration  
substrate adhesion-dependent cell spreading  
cell-substrate junction assembly  
regulation of actin filament depolymerization  
de novo protein folding  
entry into host cell  
positive regulation of endothelial cell migration  
establishment of Golgi localization

response to gravity

thrombin receptor signaling pathway

positive regulation of actin filament depolymerization

extracellular fibril organization



| <b>observed<br/>gene<br/>count</b> | <b>%<br/>total</b> | <b>false discovery<br/>rate</b> |
|------------------------------------|--------------------|---------------------------------|
| 33                                 | 56                 | 6.07E-11                        |
| 31                                 | 53                 | 0.00593                         |
| 28                                 | 47                 | 0.00214                         |
| 27                                 | 46                 | 3.00E-22                        |
| 25                                 | 42                 | 3.31E-22                        |
| 25                                 | 42                 | 2.35E-06                        |
| 25                                 | 42                 | 0.00372                         |
| 24                                 | 41                 | 1.79E-19                        |
| 23                                 | 39                 | 2.14E-05                        |
| 23                                 | 39                 | 0.00522                         |
| 23                                 | 39                 | 0.00939                         |
| 22                                 | 37                 | 0.000232                        |
| 22                                 | 37                 | 0.00121                         |
| 21                                 | 36                 | 4.58E-23                        |
| 21                                 | 36                 | 1.16E-05                        |
| 21                                 | 36                 | 0.00527                         |
| 19                                 | 32                 | 0.0162                          |
| 18                                 | 31                 | 6.15E-07                        |
| 18                                 | 31                 | 0.0265                          |
| 17                                 | 29                 | 6.56E-08                        |
| 17                                 | 29                 | 5.58E-07                        |
| 17                                 | 29                 | 0.000136                        |
| 17                                 | 29                 | 0.000938                        |
| 16                                 | 27                 | 4.76E-11                        |
| 16                                 | 27                 | 1.63E-08                        |
| 16                                 | 27                 | 0.00121                         |
| 16                                 | 27                 | 0.00392                         |
| 15                                 | 25                 | 6.80E-13                        |
| 15                                 | 25                 | 1.66E-08                        |

|    |    |          |
|----|----|----------|
| 15 | 25 | 0.00717  |
| 14 | 24 | 1.15E-18 |
| 14 | 24 | 0.00242  |
| 14 | 24 | 0.0464   |
| 13 | 22 | 4.35E-08 |
| 13 | 22 | 0.000902 |
| 13 | 22 | 0.00418  |
| 13 | 22 | 0.0125   |
| 12 | 20 | 2.40E-07 |
| 12 | 20 | 1.21E-05 |
| 12 | 20 | 1.88E-05 |
| 12 | 20 | 0.000542 |
| 11 | 19 | 6.09E-08 |
| 10 | 17 | 2.43E-15 |
| 10 | 17 | 1.14E-05 |
| 10 | 17 | 0.000201 |
| 10 | 17 | 0.000904 |
| 10 | 17 | 0.00215  |
| 10 | 17 | 0.00317  |
| 10 | 17 | 0.00343  |
| 10 | 17 | 0.00386  |
| 10 | 17 | 0.004    |
| 10 | 17 | 0.00559  |
| 10 | 17 | 0.0148   |
| 9  | 15 | 1.14E-07 |
| 9  | 15 | 4.80E-05 |
| 9  | 15 | 0.000136 |
| 9  | 15 | 0.000652 |
| 9  | 15 | 0.000848 |
| 9  | 15 | 0.00111  |
| 9  | 15 | 0.00194  |
| 8  | 14 | 0.000652 |

|   |    |          |
|---|----|----------|
| 8 | 14 | 0.00323  |
| 7 | 12 | 7.77E-08 |
| 7 | 12 | 5.50E-07 |
| 7 | 12 | 6.28E-06 |
| 7 | 12 | 0.00105  |
| 7 | 12 | 0.0019   |
| 7 | 12 | 0.00618  |
| 7 | 12 | 0.0162   |
| 6 | 10 | 5.42E-08 |
| 6 | 10 | 4.63E-06 |
| 6 | 10 | 0.000214 |
| 6 | 10 | 0.000497 |
| 6 | 10 | 0.000662 |
| 6 | 10 | 0.00073  |
| 6 | 10 | 0.000776 |
| 6 | 10 | 0.004    |
| 6 | 10 | 0.00558  |
| 5 | 8  | 2.85E-05 |
| 5 | 8  | 0.00733  |
| 5 | 8  | 0.0192   |
| 5 | 8  | 0.0224   |
| 4 | 7  | 0.0109   |
| 4 | 7  | 0.0146   |
| 4 | 7  | 0.0357   |
| 4 | 7  | 0.0407   |
| 3 | 5  | 0.0124   |
| 3 | 5  | 0.0162   |
| 3 | 5  | 0.0231   |
| 3 | 5  | 0.0306   |
| 3 | 5  | 0.0313   |
| 3 | 5  | 0.0437   |
| 2 | 3  | 0.0107   |

|   |   |        |
|---|---|--------|
| 2 | 3 | 0.0178 |
| 2 | 3 | 0.0224 |
| 2 | 3 | 0.0314 |
| 2 | 3 | 0.0314 |

## matching proteins in your network (labels)

ACTN1,ALDOA,CDC42,CFL1,CNN2,CORO1A,CSRP1,F11,FERMT3,GAP  
ACTN1,ALDOA,BIN2,CORO1C,CSRP1,F11,FERMT3,FKBP1A,GAPDH,G  
ACTC1,ACTN1,ALDOA,CNN2,CORO1A,CORO1C,CSRP1,F11,FERMT3,F  
ACTN1,ALDOA,CDC42,CFL1,CNN2,CSRP1,F11,FERMT3,GP1BA,HBD,H  
ACTN1,ALDOA,CDC42,CFL1,CSRP1,F11,FERMT3,GP1BA,HBD,HSPB1,I  
ACTN1,ALDOA,CORO1A,CSRP1,F11,FERMT3,GAPDH,GP1BA,HBD,HS  
ACTC1,ACTN1,CNN2,CORO1C,FERMT3,FKBP1A,GP1BA,HSPA8,ITGA2  
ACTN1,ALDOA,CFL1,CORO1A,CSRP1,FERMT3,FKBP1A,GP1BA,HSPB1  
ACTN1,ALDOA,BIN2,CDC42,CFL1,CORO1C,FKBP1A,HBD,HSPA8,ITGA  
ACTC1,ACTN1,CNN2,CORO1C,FERMT3,FKBP1A,GP1BA,HSPA8,ITGA2  
ACTN1,ALDOA,BIN2,CDC42,CORO1C,FKBP1A,HBD,ILK,ITGA2B,ITGB3  
ACTN1,ALDOA,BIN2,CDC42,CFL1,CORO1C,FKBP1A,HBD,HSPA8,ITGA  
ACTN1,ALDOA,BIN2,CDC42,CFL1,CORO1C,FKBP1A,HBD,ITGA2B,ITGE  
ACTN1,ALDOA,CFL1,CSRP1,FERMT3,GP1BA,HSPB1,ILK,ITGB3,MMRN  
ACTN1,CNN2,CORO1A,CORO1C,FKBP1A,HSPB1,ILK,ITGA2B,ITGB1,IT  
ACTN1,ALDOA,BIN2,CDC42,CFL1,CORO1C,FKBP1A,HBD,ITGA2B,ITGE  
ACTN1,CORO1C,FERMT3,GP1BA,HSPA8,ITGA2B,ITGB1,ITGB3,MSN,M  
ACTC1,BIN2,CDC42,CORO1C,HSPA8,HSPB1,ILK,ITGA2B,ITGB3,MSN,M  
ACTN1,CORO1C,FERMT3,HSPA8,ITGA2B,ITGB1,ITGB3,MSN,MYL12A  
ACTN1,CORO1A,CSRP1,FERMT3,FKBP1A,GP1BA,HSPB1,ILK,ITGB1,IT  
ACTN1,ALDOA,BIN2,CDC42,CFL1,CORO1C,ITGA2B,ITGB3,MMRN1,PI  
ACTN1,ALDOA,CDC42,CFL1,HSPA8,ITGA2B,ITGB3,MMRN1,MYL12A,  
CFL1,CORO1A,FERMT3,FKBP1A,GP1BA,HSPB1,ILK,ITGA2B,ITGB1,ITG  
ACTN1,ALDOA,CFL1,CORO1A,HSPA8,ITGA2B,ITGB3,MMRN1,PF4,PF  
ACTN1,CNN2,CORO1A,CORO1C,HSPB1,ILK,ITGA2B,ITGB3,MSN,PF4,I  
BIN2,CDC42,CFL1,CNN2,HSPA8,HSPB1,ITGA2B,ITGB1,ITGB3,MYL12/  
ACTN1,ALDOA,CDC42,CFL1,HSPA8,ITGA2B,ITGB3,MMRN1,MYL12A,  
ACTN1,ALDOA,CFL1,CORO1A,ITGA2B,ITGB3,MMRN1,PF4,PFN1,PLEK  
CNN2,CORO1A,CORO1C,HSPB1,ILK,ITGA2B,ITGB3,MSN,PF4,PF4V1,P

ACTN1,CFL1,CNN2,FKBP1A,GAPDH,ITGB1,ITGB3,MSN,PF4,PF4V1,PII  
ACTN1,ALDOA,CFL1,ITGA2B,ITGB3,MMRN1,PF4,PFN1,PLEK,PPIA,SP  
ACTC1,CFL1,CORO1C,FKBP1A,ILK,ITGB3,MSN,PFN1,PGK1,PKM,RAP1  
ALDOA,CNN2,HSPA8,ILK,ITGB1,MSN,MYL12A,PFN1,PLEK,RAP1B,SH3  
CSRP1,FERMT3,FKBP1A,HSPB1,ILK,ITGA2B,ITGB1,ITGB3,MSN,MYL12  
BIN2,CORO1C,HSPA8,ILK,ITGA2B,ITGB3,MSN,MYL12A,PF4,PF4V1,PF  
ALDOA,BIN2,CFL1,CORO1A,FERMT3,FKBP1A,HSPA8,ILK,TMSB4X,TRI  
ACTN1,CORO1C,FERMT3,HSPA8,ITGA2B,ITGB3,MSN,MYL12A,PIP4K  
ACTC1,ALDOA,CNN2,CORO1C,ITGB1,PFN1,PLEK,TLN1,TMSB4X,TPM  
BIN2,CDC42,CFL1,HSPA8,ITGA2B,ITGB1,ITGB3,MYL12A,PF4,PF4V1,T  
ACTN1,CDC42,CFL1,FERMT3,HSPA8,ILK,ITGA2B,ITGB3,MYL12A,TLN  
ACTN1,CDC42,CFL1,FERMT3,GP1BA,HSPA8,ITGA2B,ITGB3,MYL12A,  
CSRP1,FERMT3,FKBP1A,HSPB1,ILK,ITGA2B,ITGB3,MYL12A,PLEK,TLN  
CSRP1,FERMT3,HSPB1,ILK,ITGA2B,ITGB3,MYL12A,PLEK,TLN1,VCL  
ALDOA,CNN2,CORO1C,ITGB1,PFN1,PLEK,TLN1,TMSB4X,VASP,ZYX  
CDC42,CFL1,HSPA8,ILK,ITGA2B,ITGB3,MYL12A,TLN1,VASP,VCL  
CDC42,CFL1,HSPA8,ILK,ITGA2B,ITGB3,MYL12A,TLN1,VASP,VCL  
BIN2,CFL1,CORO1A,CORO1C,ILK,ITGB3,MSN,PF4,PF4V1,PPIA  
ALDOA,ENO2,GAPDH,HSPA8,LDHB,PGK1,PIP4K2A,PLEK,PRDX6,TPI1  
CDC42,CFL1,HSPA8,ILK,ITGA2B,ITGB3,MYL12A,TLN1,VASP,VCL  
ALDOA,CORO1C,GAPDH,ITGB1,PFN1,PLEK,TMSB4X,TUBB1,VASP,ZY  
BIN2,CFL1,CORO1A,CORO1C,ILK,ITGB3,MSN,PF4,PF4V1,PPIA  
ALDOA,CDC42,CFL1,CORO1A,CORO1C,HSPB1,ILK,MYL12A,PF4,SPAR  
CFL1,CORO1A,HSPA8,ILK,ITGA2B,ITGB3,MYL12A,PLEK,TLN1,VASP  
ACTN1,CORO1A,FERMT3,ILK,ITGA2B,ITGB1,ITGB3,VCL,ZYX  
CORO1A,HSPB1,ILK,ITGA2B,ITGB3,PF4,PF4V1,PFN1,SPARC  
CDC42,CFL1,HSPA8,ITGA2B,ITGB1,ITGB3,MYL12A,TLN1,VASP  
CDC42,CFL1,HSPA8,ITGA2B,ITGB3,MYL12A,TLN1,VASP,VCL  
CDC42,CFL1,HSPA8,ITGA2B,ITGB3,MYL12A,TLN1,VASP,VCL  
CDC42,CFL1,HSPA8,ITGA2B,ITGB3,MYL12A,TLN1,VASP,VCL  
ACTC1,CFL1,FKBP1A,ILK,ITGB1,ITGB3,PFN1,VASP,VCL  
ACTN1,FKBP1A,ILK,ITGA2B,ITGB1,ITGB3,LTBP1,SPARC

ALDOA,CDC42,CFL1,CORO1A,CORO1C,ILK,MYL12A,SPARC  
ALDOA,ENO2,GAPDH,LDHB,PGK1,PKM,TPI1  
FERMT3,ILK,ITGA2B,ITGB1,ITGB3,PLEK,ZYX  
ACTN1,ILK,ITGA2B,ITGB1,ITGB3,VCL,ZYX  
CFL1,CORO1A,ILK,PFN1,PLEK,SH3BGRL3,VASP  
CFL1,CNN2,ILK,PFN1,PLEK,SH3BGRL3,VASP  
CDC42,CFL1,ILK,PFN1,PLEK,SH3BGRL3,VASP  
ALDOA,ENO2,GAPDH,HSPA8,LDHB,PGK1,TPI1  
ALDOA,ENO2,GAPDH,PGK1,PKM,TPI1  
ALDOA,ENO2,GAPDH,LDHB,PGK1,TPI1  
CFL1,CORO1A,PFN1,PLEK,SH3BGRL3,VASP  
CORO1C,HSPB1,ITGB3,PFN1,SH3BGRL3,SPARC  
ACTN1,ILK,ITGB1,ITGB3,VASP,VCL  
ALDOA,CFL1,CORO1A,TMSB4X,VASP,ZYX  
ALDOA,ENO2,GAPDH,HSPA8,PGK1,TPI1  
CORO1A,ITGB1,ITGB3,MSN,PF4,PPIA  
CFL1,ILK,PFN1,PLEK,SH3BGRL3,VASP  
ALDOA,ENO2,GAPDH,PGK1,TPI1  
BIN2,CDC42,CFL1,CORO1A,CORO1C  
ALDOA,MYL12A,TLN1,TPM4,VCL  
ACTN1,CNN2,CORO1C,ILK,VCL  
HSPB1,ITGB3,PFN1,SPARC  
HSPB1,ITGB3,SH3BGRL3,SPARC  
ITGA2B,MSN,PF4,PF4V1  
CFL1,CORO1C,ILK,ITGB1  
FERMT3,ILK,ITGB3  
ACTN1,ITGB3,TLN1  
CFL1,PLEK,SH3BGRL3  
FKBP1A,HSPA8,TUBB1  
ITGB1,ITGB3,PPIA  
HSPB1,ITGB3,SPARC  
CDC42,YWHAZ

PKM,SPARC  
GP1BA,PLEK  
CFL1,PLEK  
FKBP1A,ILK



DH,GP1BA,HBD,HSPA8,HSPB1,ILK,ITGB1,ITGB3,MMRN1,MYL12A,PF4,PF4V1,PFN1,PKM,PLEK,PPIA,RAP1B,SPARC,TLN1,TMSB4X,VCL,ZYX

P1BA,HBD,HSPA8,HSPB1,ITGB3,LTBP1,MMRN1,MYL12A,PF4,PF4V1,PFN1,PKM,PLEK,PPIA,RAP1B,SPARC,TLN1,TMSB4X,VCL,ZYX

F-KBP1A,GP1BA,HBD,HSPA8,HSPB1,ITGB1,ITGB3,MMRN1,MYL12A,PF4,PF4V1,PFN1,PKM,PLEK,PPIA,RAP1B,SPARC,TLN1,TMSB4X,VCL,ZYX

HSPB1,ILK,ITGB1,ITGB3,MMRN1,MYL12A,PF4,PFN1,PKM,PLEK,PPIA,RAP1B,SPARC,TLN1,TMSB4X,VCL,ZYX

ILK,ITGB1,ITGB3,MMRN1,MYL12A,PF4,PFN1,PLEK,PPIA,RAP1B,SPARC,TLN1,TMSB4X,VCL,ZYX

PA8,HSPB1,ITGB1,ITGB3,LTBP1,MMRN1,PF4,PFN1,PLEK,PPIA,RAP1B,SPARC,TLN1,TMSB4X,VCL,ZYX

RAP1B,ITGB1,ITGB3,MSN,MYL12A,PFN1,PGK1,PIP4K2A,PKM,PLEK,PPIA,RAP1B,SPARC,TLN1,TMSB4X,VCL,ZYX

,ILK,ITGB1,ITGB3,MMRN1,MYL12A,PF4,PFN1,PLEK,PPIA,RAP1B,SPARC,TLN1,TMSB4X,VCL,ZYX

2B,ITGB3,LASP1,MMRN1,MYL12A,PF4,PFN1,PLEK,PPIA,SPARC,TLN1,TMSB4X,VCL,ZYX

RAP1B,ITGB1,ITGB3,MSN,MYL12A,PFN1,PGK1,PIP4K2A,PKM,PLEK,PPIA,RAP1B,SPARC,TLN1,TMSB4X,VCL,ZYX

,LASP1,LTBP1,MMRN1,MSN,MYL12A,PF4,PF4V1,PFN1,PLEK,PPIA,RAP1B,SPARC,TLN1,TMSB4X,VCL,ZYX

2B,ITGB3,LASP1,MMRN1,MYL12A,PF4,PFN1,PLEK,PPIA,SPARC,TLN1,TMSB4X,VCL,ZYX

33,LASP1,MMRN1,MYL12A,PF4,PFN1,PLEK,PPIA,SPARC,TLN1,TMSB4X,VCL,ZYX

TLN1,MYL12A,PF4,PFN1,PLEK,PPIA,RAP1B,SPARC,TLN1,TMSB4X,VCL,ZYX

ITGB3,MSN,PF4,PF4V1,PFN1,PPIA,RAP1B,SH3BGRL3,SPARC,TMSB4X,VCL,ZYX

33,LASP1,MMRN1,MYL12A,PF4,PFN1,PLEK,PPIA,SPARC,TLN1,TMSB4X,VCL,ZYX

MYL12A,PGK1,PIP4K2A,PLEK,RAP1B,TAGLN2,TLN1,TMSB4X,VCL,ZYX

MYL12A,PF4,PF4V1,PPIA,TLN1,TPM4,VASP,VCL,ZYX

,PGK1,PIP4K2A,PLEK,RAP1B,TAGLN2,TLN1,TMSB4X,VASP,VCL,ZYX

ITGB3,MMRN1,MSN,MYL12A,PLEK,TLN1,VCL,ZYX

PF4,PFN1,PLEK,PPIA,SPARC,TLN1,TMSB4X,VCL,ZYX

PF4,PFN1,PLEK,PPIA,SPARC,TLN1,TMSB4X,VCL,ZYX

ITGB3,LTBP1,MYL12A,PF4,PF4V1,PLEK,VASP,ZYX

N1,PLEK,PPIA,SPARC,TLN1,TMSB4X,VCL,ZYX

PF4V1,PFN1,SH3BGRL3,SPARC,TMSB4X,VCL,ZYX

A,PF4,PF4V1,PKM,SPARC,TLN1,VASP,ZYX

PF4,PFN1,PLEK,PPIA,SPARC,TLN1,VCL,ZYX

C,PPIA,SPARC,TLN1,TMSB4X,VCL,ZYX

PFN1,SH3BGRL3,SPARC,TMSB4X,VCL,ZYX

P4K2A,PLEK,PPIA,TRIM4,VASP  
ARC,TLN1,TMSB4X,VCL  
.B,TAGLN2,VASP,VCL  
3BGRL3,SPARC,VASP,YWHAZ  
2A,PLEK,TLN1,VCL  
PIA,TLN1,VASP  
M4,TUBB1,VASP,ZYX  
2A,RAP1B,TLN1,VASP,VCL  
4,VASP,ZYX  
LN1,VASP  
L,VASP,VCL  
TLN1,VASP,VCL  
1,VCL

K

C





A,PF4,PF4V1,PFN1,PKM,PLEK,PPIA,PRDX6,RAP1B,SPARC,TLN1,TRIM4,V1,PFN1,PKM,PLEK,PPIA,PRDX6,TLN1,TMSB4X,TRIM4,VASP,VCL  
A,PF4,PIP4K2A,PKM,PLEK,PPIA,RAP1B,TLN1,TMSB4X,TPI1,YWHAZ  
PIA,RAP1B,SPARC,TLN1,TMSB4X,VCL,YWHAZ  
PARC,TLN1,TMSB4X,VCL,YWHAZ  
RAP1B,SPARC,TLN1,VASP,VCL,YWHAZ  
RAP1B,SPARC,TAGLN2,TLN1,TMSB4X,TPI1,VCL  
SPARC,TLN1,TMSB4X,VCL,YWHAZ  
LN1,TMSB4X,VCL,YWHAZ  
RAP1B,SPARC,TAGLN2,TLN1,VCL  
A,SPARC,TLN1,VCL  
LN1,VCL,YWHAZ  
ISB4X,VCL,YWHAZ  
L,YWHAZ  
4X,VCL,YWHAZ  
ISB4X,VCL  
,VCL









MSB4X,TRIM4,VCL,YWHAZ

-,YWHAZ,ZYX

\Z
